# Supplementary material for: Identification of Host Cytosolic Sensors and Bacterial Factors Regulating the Type I Interferon Response to Legionella pneumophila
Source: PubMed Central journal article supplement (PMC2773930; doi:10.1371/journal.ppat.1000665), 2009-11-20

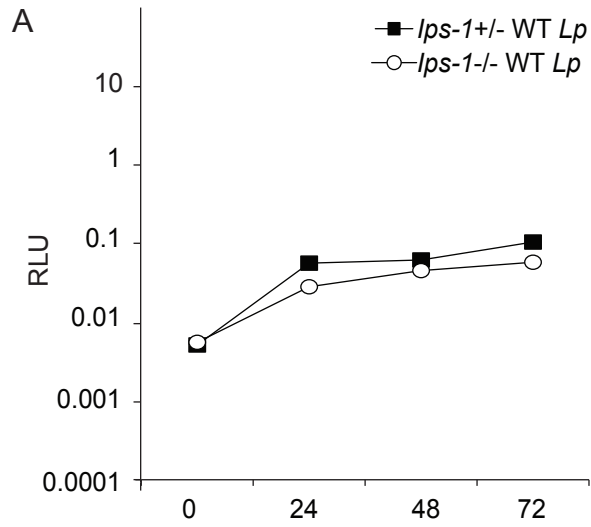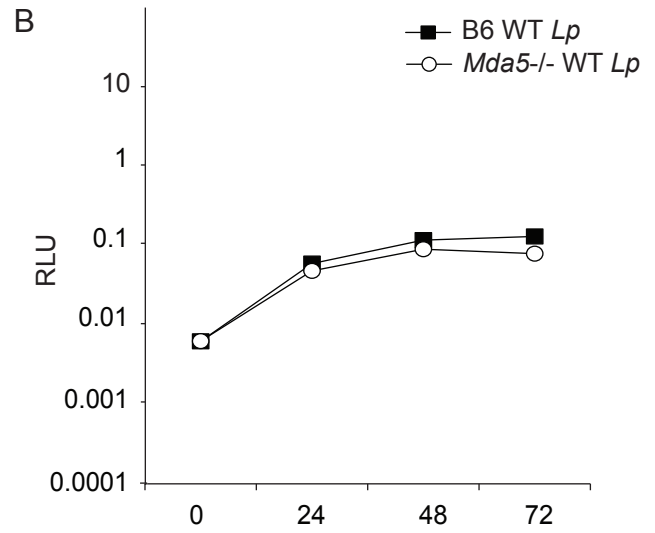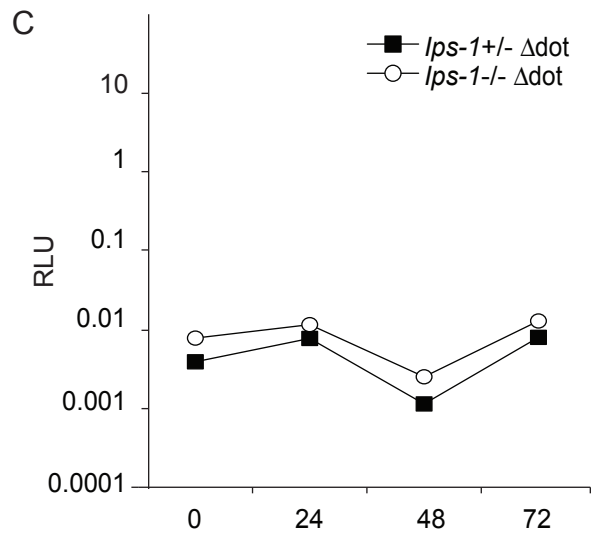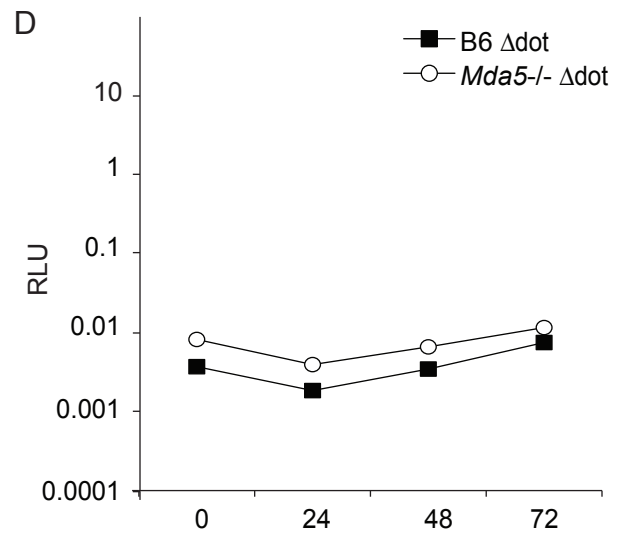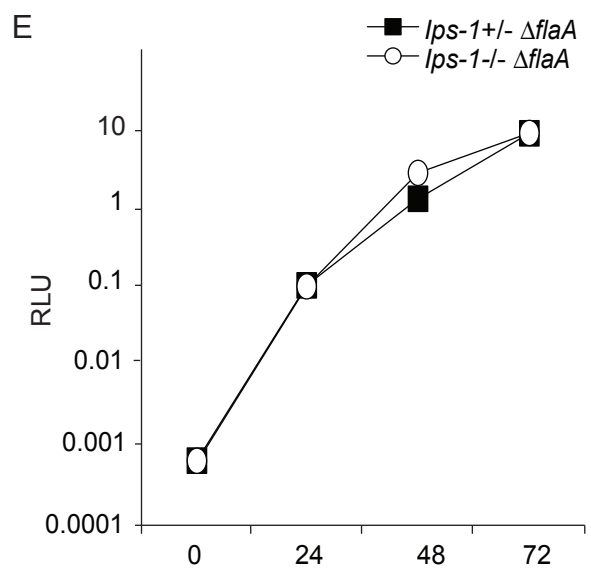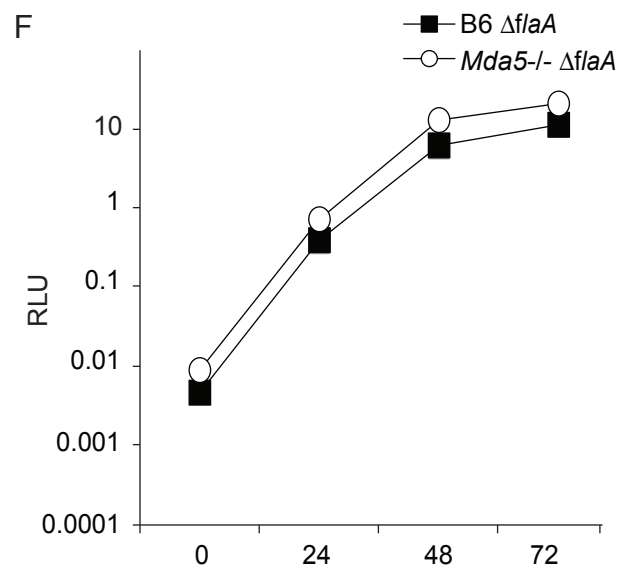

Supplement: ppat.1000665.s001.pdf [file ppat.1000665.s001.pdf]
